# Supplementary material
Source: PubMed Central journal article supplement (PMC6590894)

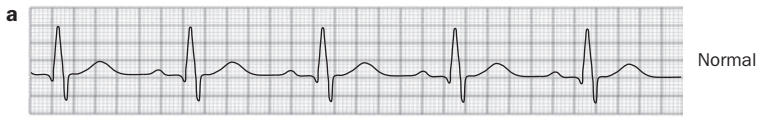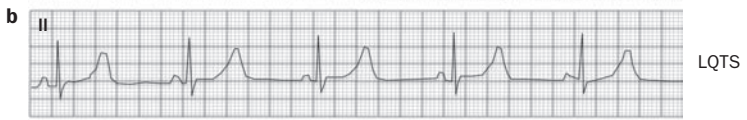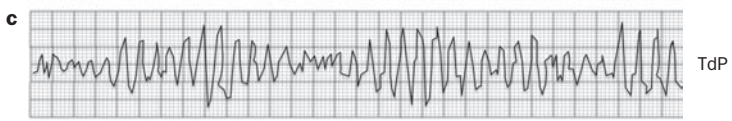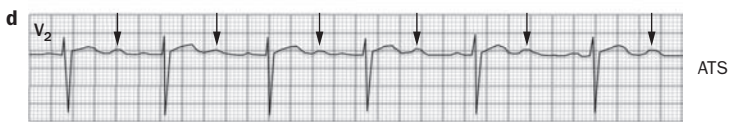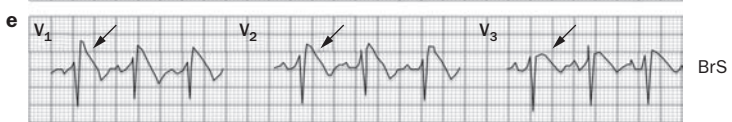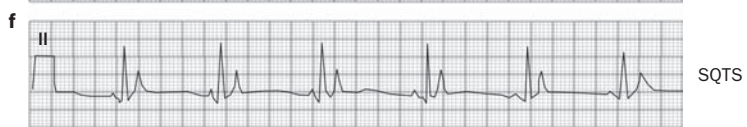

Supplement: NIHMS985415-supplement-Supplemental_Figure_1.pdf [file NIHMS985415-supplement-Supplemental_Figure_1.pdf]
